# Supplementary material
Source: Springer Nature journal article supplement (https://www.springermedizin.de/resource/supplementary/12937_2011_436_MOESM3_ESM.pdf/25653108)

# Gastric MRI after beverages

**Still Water**

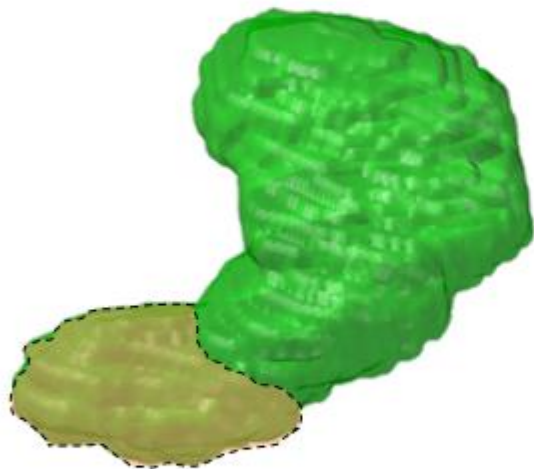

**Beverage without CO<sub>2</sub>**

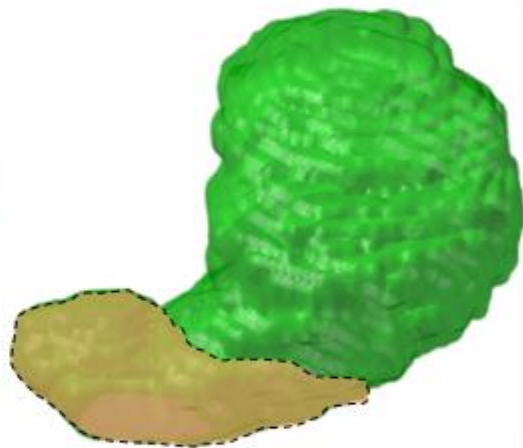

**Beverage with CO<sub>2</sub>**

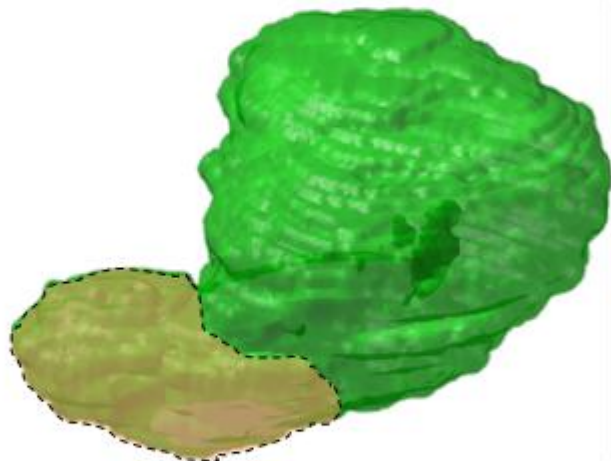

Supplement: MOESM3 [file 25653108]
